# ***Cbfa1* is required for epithelial-mesenchymal interactions regulating tooth development in mice**

**Rena N. D'Souza<sup>2,\*‡</sup>, Thomas Åberg<sup>1,‡</sup>, Joel Gaikwad<sup>2</sup>, Adriana Cavender<sup>2</sup>, Michael Owen<sup>3</sup>, Gérard Karsenty<sup>4</sup> and Irma Thesleff<sup>1,\*</sup>**

<sup>1</sup>Developmental Biology Program, Institute of Biotechnology, Viikki Biocenter, FIN-00014 University of Helsinki, Finland

<sup>2</sup>Department of Orthodontics, Dental Branch, University of Texas Health Science Center, 6516 John Freeman Avenue, Houston, Texas 77030, USA

<sup>3</sup>Imperial Cancer Research Fund, Lincoln's Inn Fields, London, UK

<sup>4</sup>Department of Molecular and Human Genetics, Baylor College of Medicine, Houston, Texas, USA

\*Authors for correspondence (e-mail: irma.thesleff@helsinki.fi, rdsouza@mail.db.uth.tmc.edu)

‡These authors contributed equally to this work

Accepted 13 April; published on WWW 7 June 1999

## **SUMMARY**

Osteoblasts and odontoblasts, cells that are responsible for the formation of bone and dentin matrices respectively, share several molecular characteristics. Recently, *Cbfa1* was shown to be a critical transcriptional regulator of osteoblast differentiation. Mutations in this gene cause cleidocranial dysplasia (CCD), an autosomal dominant disorder in humans and mice characterized by defective bone formation. CCD also results in dental defects that include supernumerary teeth and delayed eruption of permanent dentition. The dental abnormalities in CCD suggest an important role for this molecule in the formation of dentition. Here we describe results of studies aimed at understanding the functions of *Cbfa1* in tooth formation. RT-PCR and in situ hybridization analyses show that *Cbfa1* has a unique expression pattern in dental mesenchyme from the bud to early bell stages during active epithelial morphogenesis. Unlike that observed in osteoblast differentiation, *Cbfa1* is downregulated in fully differentiated odontoblasts and is surprisingly expressed in ectodermally derived ameloblasts during the maturation phase of enamel formation. The role of *Cbfa1* in tooth morphogenesis is further illustrated by the misshapen and

severely hypoplastic tooth organs in *Cbfa1*<sup>-/-</sup> mice. These tooth organs lacked overt odontoblast and ameloblast differentiation and normal dentin and enamel matrices. Epithelial-mesenchymal recombinants demonstrate that dental epithelium regulates mesenchymal *Cbfa1* expression during the bud and cap stages and that these effects are mimicked by the FGFs but not by the BMPs as shown by our bead implantation assays. We propose that *Cbfa1* regulates the expression of molecules in mesenchyme that act reciprocally on dental epithelium to control its growth and differentiation. Taken together, our data indicate a non-redundant role for *Cbfa1* in tooth development that may be distinct from that in bone formation. In odontogenesis, *Cbfa1* is not involved in the early signaling networks regulating tooth initiation and early morphogenesis but regulates key epithelial-mesenchymal interactions that control advancing morphogenesis and histodifferentiation of the epithelial enamel organ.

Key words: *Cbfa1/Osf2*, Odontogenesis, Epithelial morphogenesis, Inductive signalling, Knockout mice, Odontoblasts, Ameloblasts

## **INTRODUCTION**

Tooth development begins when regional signals emanating from oral ectoderm induce molecular changes in underlying cranial neural crest-derived ectomesenchyme. The invagination of the dental lamina and its development into a morphologically distinct enamel organ is then influenced by signals from the dental papilla mesenchyme. This reciprocal and inductive exchange of molecular signals between tooth ectoderm and mesenchyme regulates tooth morphogenesis and culminates in the differentiation of odontoblasts, ameloblasts and cementoblasts and the formation of dentin, enamel and cementum matrices respectively. Due to its suitability for in

vitro manipulation, the developing tooth organ provides a unique model to study the complex interplay of signaling molecules that confer positional information, determine size and shape and influence the terminal differentiation of matrix-producing cells (reviews: Thesleff et al., 1995; Thesleff and Nieminen, 1996; Maas and Bei, 1997; Thesleff and Sharpe, 1997).

In vivo and in vitro tissue recombination studies have demonstrated the shift of inductive potential from odontogenic epithelium to mesenchyme between mouse embryonic days E11 and E12 (Mina and Kollar, 1987, Lumsden, 1988). Recent investigations have unravelled the molecular basis for the transfer of odontogenic potential between dental epithelium

and mesenchyme. These studies indicate that signaling molecules in the BMP (bone morphogenetic protein), FGF (fibroblast growth factor) Hh (hedgehog) and Wnt families as well as several transcription factors, play a key role in tooth bud formation and progression to the cap stage (Thesleff and Sharpe, 1997). Despite this progress in understanding the molecular basis for tooth initiation and early morphogenesis, little is known about the molecules involved during advancing tooth morphogenesis and cytodifferentiation.

The condensation of odontogenic mesenchyme at E12 is coincident with the aggregation of cells in surrounding preosteogenic mesenchyme. As development progresses, osteogenesis and odontogenesis remain intimately associated. The terminal differentiation of osteoblasts and odontoblasts from mesenchymal condensates is marked by the expression of type I collagen, a structural protein of bone and dentin. Despite these similarities there are several differences that distinguish dentin from bone (Linde and Goldberg, 1993). Whether odontogenesis and osteogenesis share common signaling pathways and how divergence, if any, is achieved between odontoblasts and osteoblasts remain central issues in skeletal biology.

Recent discoveries have revealed that a transcription factor called *Cbfa1* (core binding factor A1) also referred to as *Osf2* (osteoblast specific factor 2), is a critical regulator of osteoblast differentiation (Ducy and Karsenty, 1995). *Cbfa1* is the mouse homologue of the *Drosophila* pair-rule gene *runt* (Ogawa et al., 1993) and its expression in mouse is largely restricted to areas of mesenchymal condensation that form the future skeleton (Ducy et al., 1997; Komori et al., 1997; Otto et al., 1997; Ducy and Karsenty, 1995). Osteoinductive growth factors like the BMPs, regulate *Cbfa1* expression in osteoblasts. The transcriptional molecule is also able to regulate the expression of multiple extracellular matrix genes in osteoblasts and its overexpression can induce osteoblast-specific gene expression in fibroblasts and myoblasts (Ducy et al., 1997). Mice homozygous for a targeted deletion of *Cbfa1*, show no osteoblast differentiation and hence completely lack bone (Komori et al., 1997; Otto et al., 1997). Thus, *Cbfa1* is a transcriptional activator of osteoblast differentiation that is needed for in vivo bone formation.

Genetic studies have recently identified the lack of expression of one allele of *Cbfa1* as the basis for the cleidocranial dysplasia syndrome (CCD) in mice and humans (Otto et al., 1997; Mundlos et al., 1997; Lee et al., 1997). CCD is an autosomal-dominant inherited disorder characterized by delayed ossification, patent fontanelles and Wormian bones. In addition, the dentition is affected with multiple supernumerary teeth arising from the permanent dentition that fail to erupt (Jones et al., 1997). The critical importance of *Cbfa1* in osteogenesis and the dramatic changes affecting dentition in CCD patients suggest an important yet poorly understood role for this molecule in tooth development. Furthermore, it is unclear whether the defects in CCD dentition are linked to disturbances in osteogenesis or whether *Cbfa1* directly influences key events during tooth development.

To gain a better understanding of *Cbfa1*'s function we analyzed its temporal and spatial expression from early to late phases of odontogenesis and performed a histologic analysis of tooth development in mice lacking *Cbfa1*. We further explored the regulation of its expression in mandibular and

tooth mesenchyme by using tissue recombination and bead implantation assays. Our data indicate that *Cbfa1* expression in dental mesenchyme is intimately associated with epithelial-mesenchymal interactions during tooth development and is affected by epithelial signals that involve the FGFs. Taken together, our results suggest that *Cbfa1* regulates the expression of mesenchymal factors that influence the morphogenesis and histodifferentiation of the epithelial enamel organ.

## MATERIALS AND METHODS

### RT-PCR analysis

Mandibular and maxillary molar segments/molars, long bone, calvaria and liver were dissected from E15 and E18 embryos as well as from newborn and adult (postnatal day (P) 21) mice. Tissues were snap-frozen in liquid nitrogen and stored at  $-80^{\circ}\text{C}$ . Total RNA was extracted using RNA STAT-60 (Tel-Test Inc., Texas) and first strand cDNA synthesized using oligo(dT) primers and reverse transcriptase (Perkin Elmer Cetus, Norwalk, CT, USA). cDNAs were amplified using *Cbfa1*-specific primers and PCR conditions as described by Komori et al. (1997). PCR products were fractionated on a 2% agarose gel and transferred to nitrocellulose membrane, Hybond N+ (Amersham Co., Illinois).

### Tissues for in situ hybridization

Heads from B6D2F2 and (CBAT6T6  $\times$  NMRI) F<sub>1</sub> hybrid mouse embryos staged from E10 to E18 (vaginal plug appearance = E0) as well as from newborn (NB) and 2-, 4-, 7-day old (P2, P4 and P7) mice, were fixed in 4% paraformaldehyde or 10% neutral buffered formalin (NBF) for up to 48 hours at  $4^{\circ}\text{C}$ . Postnatal tissues were demineralized in 12.5% buffered-EDTA with 2.5% paraformaldehyde for 2 weeks and then processed for paraffin wax embedding. Serial sections prepared in either the sagittal or coronal/frontal planes were mounted on silane-coated slides.

### Probes and in situ hybridization

The following cDNAs were used to generate [ $\alpha$ - $^{35}\text{S}$ ]UTP sense and antisense riboprobes using either T3, T7 or SP6 RNA polymerases: 336 bp 5' *EcoRI-XbaI* of murine *Cbfa1* (Ducy et al., 1997) and a 600 bp 5' *PstI-HindIII* fragment of murine *Cbfa1* (kindly provided by Dr Komori, Osaka University Medical School, Osaka, Japan); 321-bp 3' *EcoRI-HindIII* mouse *pro $\alpha$ 1*(1) collagen (Metsäranta et al., 1991) and a 500 bp 5' *NcoI-PstI* murine DSPP fragment (D'Souza et al., 1997). In situ hybridization was performed under high stringency as described previously (Vainio et al., 1991; D'Souza et al., 1993). Images were digitized and figures processed as described previously (Åberg et al., 1997).

### Histologic examination of dentition in *Osf2/Cbfa1*<sup>-/-</sup> mice

Heads from *Cbfa1*<sup>-/-</sup> mice at E16.5 and neonatal stages were obtained from intercrosses of heterozygous breeding pairs in our laboratory (G. K.). Genotyping was performed as previously described (Otto et al., 1997). Tissues were fixed in 10% NBF overnight at  $4^{\circ}\text{C}$  and then processed for paraffin wax embedding. Serial sections prepared in the frontal plane were stained with hematoxylin and eosin. Comparisons were made with *Cbfa1*<sup>+/-</sup> and *Cbfa1*<sup>+/+</sup> littermates.

### Mandibular arch and tooth epithelial-mesenchymal recombinants

Mandibular processes were dissected from E11 (CBA  $\times$  NMRI) F<sub>1</sub> embryos. They were cultured as whole explants or the epithelium was separated from mesenchyme and then recombined as described by Vainio et al. (1993). When E14 molar mesenchyme was separated

from epithelium it consisted of the papilla and follicle mesenchyme. For E14 experiments, the papilla was carefully dissected free from the follicle and surrounding mesenchyme. At earlier stages, it was not possible to cleanly dissect the dental papilla from follicle mesenchyme.

Beads were implanted on mesenchyme that was cultured on Nuclepore filters (pore size 0.1  $\mu\text{m}$ ; Costar, Pleasanton, CA) using conditions described previously (Vainio et al., 1993). Tissues were treated with 100% methanol for 1-2 minutes and fixed in 4% paraformaldehyde overnight for whole-mount in situ hybridization. Some whole mounts were embedded in gelatin/albumin and sectioned at 200  $\mu\text{m}$  with a vibratome.

### Recombinant proteins and bead implantation assays

Heparin acrylic beads (Sigma H-5263) were used with FGF-4 and FGF-8 peptide (R&D Systems, Abingdon, Oxon, UK) and Affi-gel blue (BioRad) beads with recombinant BMP-2, BMP-4 and BMP-7 proteins (kind gift from J. Wozney, Genetics Institute, MA, USA). Beads were counted (100 beads/tube), washed and pelleted by centrifugation and then incubated 45 minutes at 37°C with FGF-4 or FGF-8 (25 ng/ $\mu\text{l}$ ), BMP-2, BMP-4 and BMP-7 (100 ng/ $\mu\text{l}$ ) or bovine serum albumin (BSA, 1  $\mu\text{g}/\mu\text{l}$ ). Beads were placed on explants using a capillary pipette. Whole-mount in situ hybridization was done as described by Henrique et al. (1995) and modified by Jernvall et al. (1998) using probe concentrations of 0.5  $\mu\text{g}/\text{ml}$ . The tissues were treated with proteinase K at 10  $\mu\text{g}/\text{ml}$  at 37°C for 7 to 20 minutes.

## RESULTS

### *Cbfa1* is temporally and spatially regulated during craniofacial development

RT-PCR analyses showed *Cbfa1* transcripts of the expected size in E15 mineralizing tissues, expression being most dominant in calvaria (Fig. 1A). Relatively high levels of *Cbfa1* expression were evident in first molars, long bone and calvaria at E18 and at the neonatal stage. At 21 dpn (days of postnatal development), lower *Cbfa1* expression was observed in first molar and long bone when compared to the second molar and calvaria. Southern blots of select RT-PCR products (Ducy et al., 1997) confirmed the presence of *Cbfa1* in all mineralizing organs, studied. No *Cbfa1* signal was detected in an E15 liver sample (data not shown).

In situ hybridization analysis revealed no *Cbfa1* expression in any craniofacial tissues at E11 (data not shown). *Cbfa1* expression became evident at E12 in areas of future osteogenesis (Fig. 2A,B). In contrast, non-mineralizing tissues including Meckel's cartilage, muscle, epithelium and nerve were negative. Higher magnification views revealed *Cbfa1* in the mesenchyme near the invaginating dental epithelium that was contiguous with that in preosteogenic mesenchyme. Analysis of serial sections revealed fewer *Cbfa1* transcripts in mesenchyme nearest the tooth epithelial-mesenchymal interface (Fig. 2B).

At E13, the *Cbfa1* expression had enlarged to include the preosteogenic mesenchyme surrounding the nasal capsule (Fig. 2C). Intense hybridization was observed in mesenchyme contacting the dental epithelium at the tip of the tooth bud (Fig. 2D). At the cap stage (E14), high levels of *Cbfa1* expression were evident in dental papilla and follicle as well as in osteogenic zones clearly demarcating these regions from surrounding tissues (Fig. 2E). The mesenchyme between the tooth germ and the oral epithelium was consistently negative for *Cbfa1* expression. By E16, this region showed positive hybridization with the *Cbfa1* riboprobe (Fig. 2G). At this early bell stage, *Cbfa1* expression was markedly downregulated in cuspal regions of the dental papilla mesenchyme (Fig. 2G). Higher levels of *Cbfa1* expression appeared in a distal section of the apical area of the dental papilla between the cervical loop epithelia (Fig. 2H). At the late bell stage (E18), *Cbfa1* expression was downregulated throughout the dental papilla. In contrast, intense hybridization remained in the dental follicle and in osteoblasts within alveolar bone (Fig. 2I).

### *Cbfa1* expression is downregulated in differentiated odontoblasts and upregulated in maturational ameloblasts

Fig. 3 depicts the expression profile of *Cbfa1* mRNA in early postnatal life. At the newborn stage (NB; Fig. 3A) and at 4 dpn (Fig. 3B) *Cbfa1* expression was intense in all osteoblasts and in the dental follicle that will give rise to cementoblasts and periodontal ligament (Fig. 3B). Newly differentiated odontoblasts and dental pulp cells near the cervical loop showed weaker levels of *Cbfa1* expression while mature odontoblasts were negative. Epithelium remained negative including the stellate reticulum and secretory ameloblasts (Fig. 3B). At 7 dpn, high levels of *Cbfa1* expression remained in the dental follicle (Fig. 3D). Unlike secretory ameloblasts that appeared negative, maturational ameloblasts appeared strongly positive for *Cbfa1* as seen in Fig. 3C (box E), Fig. 3E and in a section through an incisor at 2 dpn (Fig. 3F).

*Cbfa1* expression was downregulated in differentiated

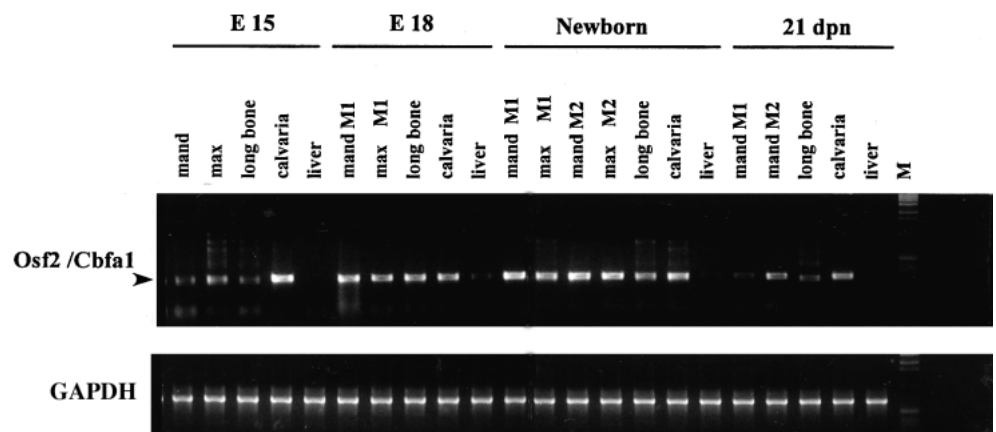

**Fig. 1.** RT-PCR analysis showing *Cbfa1* expression in mineralizing organs. No PCR products were visible in liver samples. Amplification products of GAPDH, an internal positive control, remained constant for each reaction. mand, mandible; max, maxilla process; mand M1, mandibular first molar; max M1, maxillary first molar; M, 1-kb DNA ladder. Arrowhead points to the 289 bp *Cbfa1* PCR product. Southern blot analysis of select RT-PCR products confirmed the presence of the gene in mineralizing tissues (data not shown).



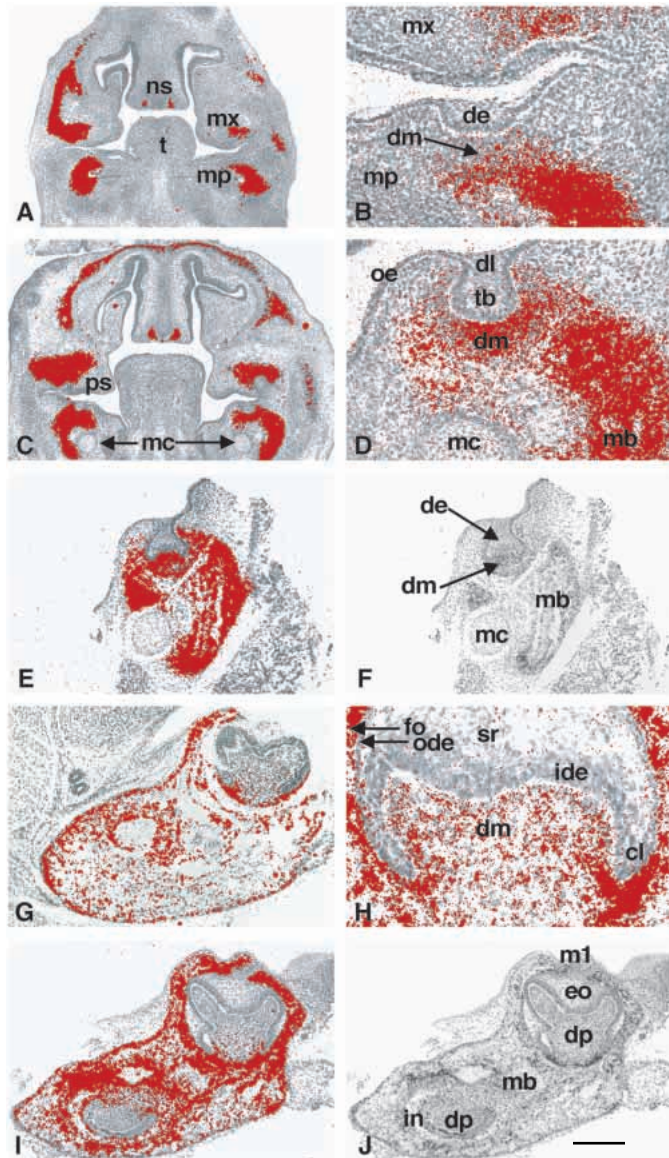

**Fig. 2.** Localization of *Cbfa1* mRNA in frontal sections of developing mouse heads. (A) At E12, transcripts are restricted to osteogenic and odontogenic zones as seen in a section through the molar region. Tissues not destined to mineralize are negative. (B) Higher magnification reveals intense signal in pre-osteogenic mesenchyme with faint hybridization in dental mesenchyme nearest the dental ectoderm. (C) *Cbfa1* expression spreads at E13 but remains restricted to mineralizing regions of bone and teeth. (D) Higher magnification of the mandibular molar organ shows intense *Cbfa1* expression in dental mesenchyme contacting the tip of the tooth bud. The dental and oral epithelium as well as Meckel's cartilage and mandibular nerve are completely negative. (E) At the cap stage (E14), *Cbfa1* is intensely expressed in dental papilla and follicle mesenchyme as well as the osteogenic zone. (F) A bright-field view of the same field. (G) At the early bell stage (E16), *Cbfa1* expression is downregulated in dental mesenchyme. (H) A more peripheral section through a less mature region of the molar shows higher levels of *Cbfa1*. Note the intense signal present in dental mesenchyme near the cervical loop. (I) At the late bell stage (E18), dental follicle and mandibular bone remained intensely positive for *Cbfa1*. (J) Bright-field image of I. mx, maxillary process; mp, mandibular process; mc, Meckel's cartilage; t, tongue; ns, nasal septum; de, dental epithelium; dm, dental mesenchyme; ps, palatal shelf; oe, oral ectoderm; mb, mandibular bone; sr, stellate reticulum; fo, dental follicle; ode, outer dental epithelium; ide, inner dental epithelium; cl, cervical loop; in, incisor; m1, first molar. Scale bar: (A,C), 500  $\mu$ m; (E,F,G,I,K), 250  $\mu$ m; (B,D,H), 100  $\mu$ m.

odontoblasts prior to the expression of dentin matrix genes. As indicated in Fig. 3G, dentin sialophosphoprotein (*Dspp*) was expressed transiently in preameloblasts and in newly differentiated odontoblasts but not in osteoblasts at the newborn stage. At 2 dpn,  $\alpha$ 1(I) collagen was expressed in differentiated odontoblasts and osteoblasts (Fig. 3H). Thus, the developmental profiles of *Cbfa1* expression in odontoblasts and osteoblasts appear different suggesting that the gene may be differentially regulated in these cells.

### ***Cbfa1* is required for normal tooth development**

Fig. 4 illustrates our phenotypic analysis of tooth development in E16.5 and newborn *Cbfa1*<sup>-/-</sup> mice. At E16.5, first molars in a *Cbfa1*<sup>+/-</sup> littermate appeared normal and showed cuspal morphogenesis (mandibular molar; Fig. 4A,B). E16.5 *Cbfa1*<sup>-/-</sup> molars were significantly smaller with poor differentiation of the enamel organ that had only advanced to the cap stage. As previously reported, the absence of *Cbfa1* resulted in a complete lack of osteoblast differentiation and

bone formation (Fig. 4C,D). Similar differences existed between *Cbfa1*<sup>+/-</sup> (Fig. 4E) and *Cbfa1*<sup>-/-</sup> incisors, the latter appearing markedly hypoplastic and developmentally delayed (Fig. 4F). Interestingly, tissue separation at the epithelial-mesenchymal interface was seen in all *Cbfa1*<sup>-/-</sup> sections suggesting that the integrity of this region was compromised in the absence of *Cbfa1* (Fig. 4C,D,F).

At birth, *Cbfa1*<sup>+/-</sup> first molars were at the late bell stage (Fig. 4G). In contrast, *Cbfa1*<sup>-/-</sup> molar organs had only progressed up to the cap/early bell stage. The defective enamel organ showed poorly delineated cuspal outlines. Although the dental papilla had formed, no overt differentiation of odontoblasts was observed (Fig. 4H). In a neonate wild-type incisor, well differentiated ameloblasts and odontoblasts and an organized layer of predentin and dentin were visible. In contrast, *Cbfa1* mutant incisor organs were hypoplastic with poorly differentiated cells and a highly disorganized layer of an osteodentin-like matrix (Fig. 4J).

These results indicate that the absence of *Cbfa1* affected both molar and incisor development suggesting a non-redundant role for *Cbfa1* in tooth organogenesis. It is likely that differences in the severity of the molar and incisor phenotype are due to the earlier developmental schedule of incisors.

### **The onset and maintenance of *Cbfa1* expression in mandibular osteogenic mesenchyme at E11 is not dependent on epithelial signals**

There is evidence that bone formation in the embryonic facial processes is dependent on signals from the epithelium (Hall, 1978). In order to analyze whether the onset of *Cbfa1* expression in mesenchyme requires the presence of epithelium, we cultured E11 mandibular arches as explants in the presence and absence of epithelium. *Cbfa1* expression was not seen in



the mandibular arches at this stage in vivo. When mandibles were cultured as whole explants for 24 hours, intense *Cbfa1* expression was seen in the lateral aspects of the arch (Fig. 5A). The expression domain was significantly extended after two days, and the molar and incisor regions appeared less intense (Fig. 5B). When E11 mandibular mesenchyme was cultured without epithelium for 24 hours, *Cbfa1* expression was apparent in both halves of the mandible (Fig. 5C). This indicates that the mesenchyme had been committed to *Cbfa1* expression prior to E11 and that epithelium was not needed for the induction or maintenance of *Cbfa1* expression in mesenchyme.

**The dental epithelium is capable of stimulating *Cbfa1* expression in dental mesenchyme during the bud stage**

To specifically address whether odontogenic epithelium could stimulate the induction of *Cbfa1* expression in dental mesenchyme, we separated the presumptive dental epithelium from mesenchyme at E11, prior to the appearance of *Cbfa1*. Tissues were then cultured in recombination for 24 hours. In E11 presumptive molar mesenchyme cultured without epithelium, a patch of *Cbfa1* expression likely representing osteogenic mesenchyme was visible (Fig. 5D). When recombined with E11 epithelium, a translucent zone appeared in the mesenchyme contacting the epithelium indicating that interactions between the tissues had occurred (Fig. 5E). However, whole-mount hybridization showed an absence of *Cbfa1* in this region of mesenchyme in all 21 explants studied (Fig. 5F). Similar results were observed in twelve recombinant cultures of E12 dental epithelium and mesenchyme (data not shown). In E13 recombinants, a clear induction of *Cbfa1* was evident throughout the translucent mesenchyme in two out of ten explants (Fig. 5G,H). In five explants, expression was seen in part of the translucent zone (Fig. 5I) while three explants showed no expression (data not shown). Patches of *Cbfa1* expression were seen in E11, E12 (not shown) and E13 mesenchyme when cultured alone as well as in the recombinants, in areas not correlating with the location of the epithelium. These presumably represent osteogenic mesenchyme.

At E14, the cap stage, *Cbfa1* expression was intense throughout the dental papilla and surrounding follicle and osteogenic mesenchyme (see Fig. 2E and F). When the entire dental mesenchyme (papilla and surrounding mesenchyme) was cultured in isolation, *Cbfa1* expression was downregulated in most of the mesenchyme but distinct patches of expression remained (Fig. 5J). When dental papillae were cleanly dissected from the mesenchyme and then cultured in isolation, *Cbfa1* was absent in six of the seven explants (Fig. 5K). These results correlate with results of the expression analysis that show *Cbfa1* expression in follicle and osteogenic mesenchyme but not within the dental papilla (see Fig. 2G-I). The culture of dental epithelium in contact with dental papilla mesenchyme stimulated *Cbfa1* expression in single and double recombinants where two pieces of epithelia were sandwiched between two mesenchymes (Fig. 5L,M respectively). Vibratome sections showed that expression had been induced in the mesenchyme immediately underlying the epithelium (Fig. 5N). None of the control

explants showed positive hybridization with *Cbfa1* sense probes (Fig. 5O).

Interestingly, in mandibular arch and tooth recombinant cultures, we observed that the presence of epithelium favored the size of the mesenchyme that appeared larger than when cultured without epithelium (Fig. 5). This suggests that the dental epithelium had a positive stimulatory effect on mesenchymal survival.

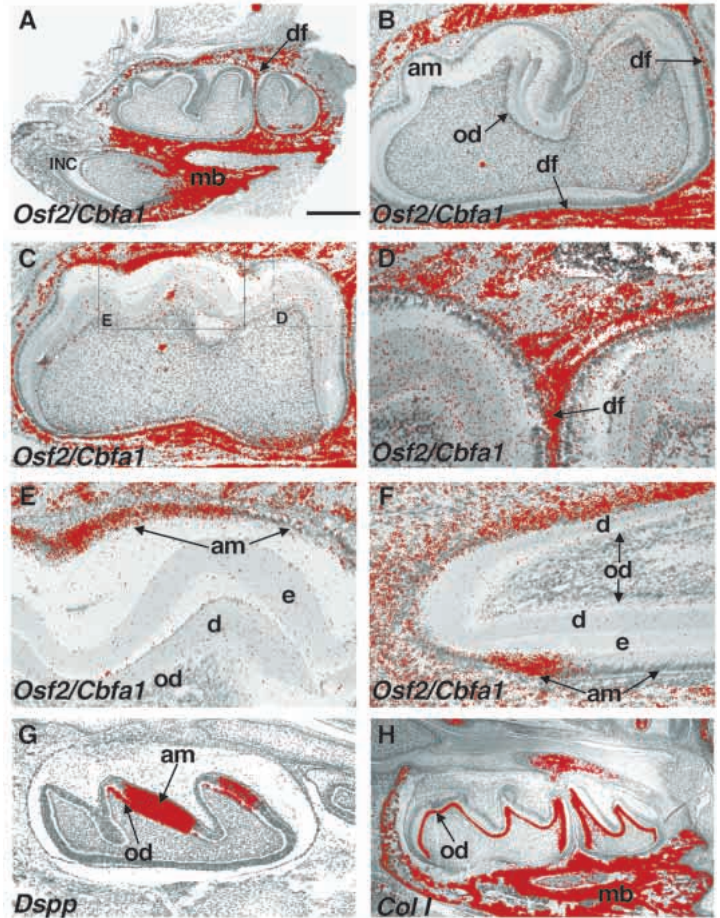

**Fig. 3.** *Cbfa1* expression in tooth organs during postnatal development. (A) A mandible of a newborn mouse showing high levels of *Cbfa1* mRNA within bone and dental follicle. Although dental papilla is negative, *Cbfa1* expression is pronounced in the apical region of the tooth organ. (B) During matrix formation at 4 dpn, *Cbfa1* remains highly expressed in dental follicle and surrounding bone. Secretory odontoblasts and ameloblasts do not express *Cbfa1* mRNA. (C) At 7 dpn, *Cbfa1* transcripts persist in dental follicle and surrounding bone (boxed areas in C shown in higher magnification in D and E). Interestingly, hybridization signal is visible in a restricted population of ameloblasts (am, long arrow in E) in the maturation stage of amelogenesis. Ameloblasts lateral to this zone (short arrow in E) that have presumably not entered the maturative stage appear negative. (F) In a 2 dpn incisor *Cbfa1* is seen in a comparable zone of mature ameloblasts. The downregulation of *Cbfa1* in odontoblasts (see A) coincides with the expression of *Dspp*, an odontoblast-specific marker. (G) Transient expression of *Dspp* is seen in a group of pre-ameloblasts (am). (H) In contrast to *Cbfa1*, type I collagen is expressed in all odontoblasts and osteoblasts at 2 dpn. df, dental follicle; inc, incisor; mb, mandibular bone; am, secretory ameloblasts; od, odontoblasts; e, enamel; d, dentin. Scale bar: (A,H) 500 µm; (B,C,G) 250 µm; (D,E,F) 100 µm.



### ***Cbfa1* expression in dental mesenchyme is stimulated by FGFs but not by BMPs**

At E11, the dental epithelium expresses *Fgf-8* as well as *Bmp-2* and *Bmp-7* in vivo and these signaling molecules regulate a number of genes in dental mesenchyme (review: Thesleff and Sharpe, 1997). Since the E11 epithelium did not stimulate *Cbfa1* expression in recombinant cultures, it was unlikely that these signal proteins would have stimulatory effects. Indeed, no stimulation of *Cbfa1* expression in E11 mesenchyme was seen with beads releasing BMP-2 and BMP-7 in the twelve (BMP-2) and six (BMP-7) explants analyzed (Fig. 6A and B respectively). BMP-4 beads also did not stimulate *Cbfa1* expression in six explants (data not shown). The activities of BMP-2 and BMP-7 were confirmed by the earlier well documented induction of *Msx1* expression in E11 mesenchyme (Fig. 6C,D; Vainio et al., 1993).

A total of twelve (BMP-2), six (BMP-4) and six (BMP-7) E14 mesenchyme explants were analyzed. At this developmental stage (E14) in vivo, all three *Bmps* are expressed in the dental epithelium (Vaahtokari et al., 1996). Interestingly, BMP-2, BMP-4 and BMP-7 releasing beads consistently failed to stimulate *Cbfa1* expression in dental mesenchyme (Fig. 6E-G) indicating that they are not required for the maintenance of *Cbfa1* expression. Controls with BSA-soaked beads were completely negative (Fig. 6H).

Beads soaked with FGF-8 failed to stimulate *Cbfa1* expression in any of the seven E11 mesenchymes analyzed (Fig. 7A). FGF-4 beads also failed to elicit a clear zone of *Cbfa1* expression in any of the 24 cultures of E12 mesenchyme studied (Fig. 7C). In most cultures, *Cbfa1*-positive patches were seen in explants with FGF-4, FGF-8 as well as control BSA beads, but the analysis of a large number of explants indicated that these patches of *Cbfa1* expression near the beads were not induced by FGF. Rather they represent *Cbfa1*-expressing cells in areas of contaminating osteogenic mesenchyme (Fig. 7A-D).

Interestingly, in E13 dental mesenchyme, i.e. the stage when dental epithelium was first shown to stimulate *Cbfa1* expression, a clear zone of *Cbfa1* induction was observed around the FGF-4 beads in 17 out of 22 explants (Fig. 7E). The control BSA beads had no observable effects (Fig. 7F). At E14, FGF-4 had a clear stimulatory effect on *Cbfa1* expression in all ten explants analyzed (Fig. 7G,H). In explants which included surrounding mesenchymal tissue, patches of *Cbfa1* expression were observed in the periphery (Fig. 7G). FGF-8 had a similar

stimulatory effect as FGF-4 in 5 out of the 6 explants studied (data not shown).

Hence, the results from the bead assays are consistent with those from epithelial-mesenchymal tissue recombinations and indicate that epithelial signals do not induce *Cbfa1* expression in the dental mesenchyme prior to E13. Therefore, FGFs are needed for the stimulation of expression in the dental papilla

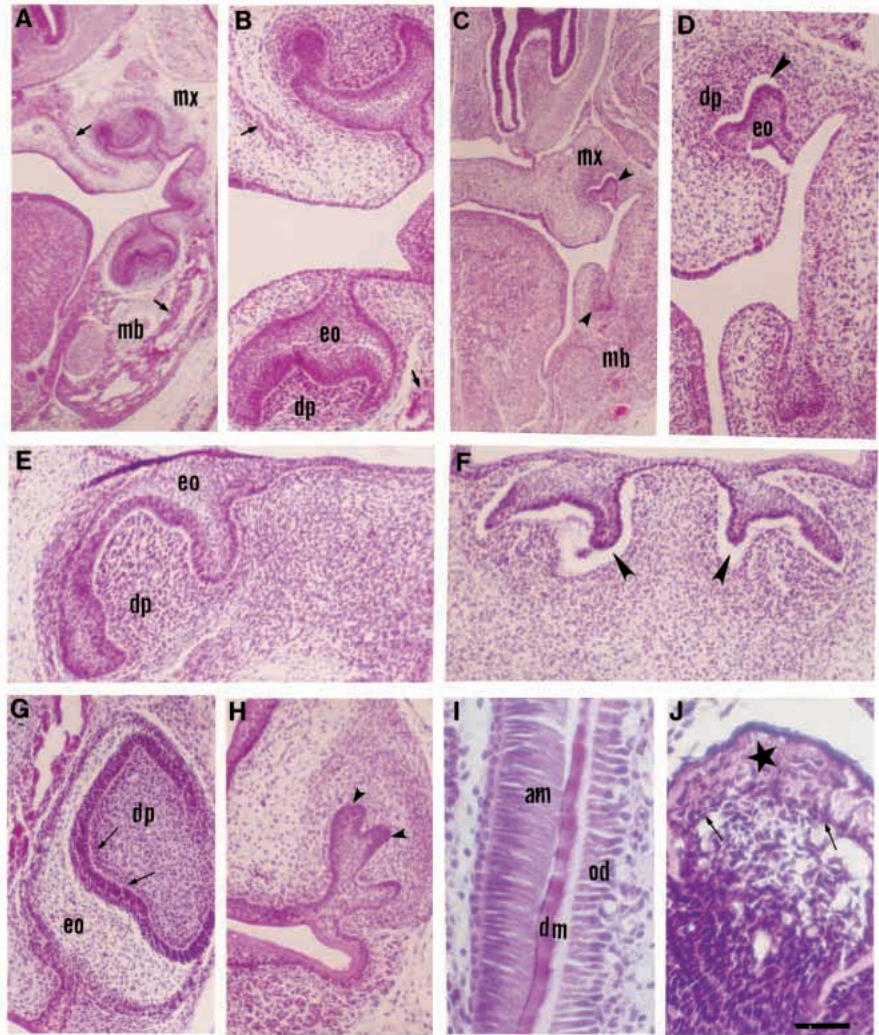

**Fig. 4.** Histologic survey of tooth development in E16.5 and newborn *Cbfa1*<sup>+/+</sup> and *Cbfa1*<sup>-/-</sup> mice as seen in frontal sections. (A,B) E16.5, *Cbfa1*<sup>+/+</sup> maxillary and mandibular first molars at the early and late bell stages of development respectively. Arrows point to normal bone formation (A, low magnification; B, higher magnification). (C,D) E16.5, *Cbfa1*<sup>-/-</sup> molars at the cap stage are hypoplastic and poorly differentiated. Bone is completely absent (C, low magnification; D, higher magnification). (E) E16.5 normal *Cbfa1*<sup>+/+</sup> incisor at the late bell stage while in contrast, a *Cbfa1* mutant incisor (F) shows delayed development. Note the tissue separation at the epithelial-mesenchymal interface (arrowheads) similar to that seen in C and D. (G) At birth, a *Cbfa1*<sup>+/+</sup> first maxillary molar shows a well differentiated enamel organ and dental papilla. Arrows indicate the layer of differentiating odontoblasts. (H) A defective *Cbfa1*<sup>-/-</sup> newborn first molar shows the poorly differentiated layers of the enamel organ and the aberrations in cuspal morphogenesis. The peripheral layer of cells in the dental papilla show no polarization. (I) Incisor of a newborn *Cbfa1*<sup>+/+</sup> mouse with normal odontoblast and ameloblast differentiation and dentin matrix. (J) In sharp contrast, an incisor of a newborn *Cbfa1* mutant shows a poorly differentiated enamel organ and a flattened layer of odontoblast-like cells (arrows) near a highly disorganized matrix (★). mx, maxilla; mb, mandible; eo, enamel organ; dp, dental papilla; am, ameloblasts; od, odontoblasts; dm, dentin matrix. Scale bars: (A-D), 100 µm; (E-H), 50 µm; (I,J), 25 µm. Stain: H&E.

**Fig. 5.** Effects of epithelium on the initiation of *Cbfa1* expression in E11 whole mandibular arch explants and in E11-E14 tooth explants. Gene expression in each explant was monitored by whole-mount in situ hybridization. *Cbfa1* was not detected at the onset of culture (not shown). (A,B) E11 intact mandibular arch cultured for 24 and 48 hours respectively show expression of *Cbfa1* in the osteogenic areas. After 48 hours (B) expression had extended fully into the osteogenic area that has assumed the shape of the mandibular arch. Tooth bearing areas show fainter hybridization (arrows). (C) E11 mandibular arch mesenchyme cultured without epithelium for 24 hours shows *Cbfa1* expression, although the arch is reduced in size as compared to A and B. D-O show the effects of dental epithelium on the induction of *Cbfa1* expression in tooth mesenchyme. Epithelial and mesenchymal tissues from first molar organs were separated and then recombined in culture for 24 hours. *Cbfa1* expression was analyzed by whole mount in situ hybridization. (D) In E11 molar mesenchyme a patch of *Cbfa1* expression was seen which presumably represents osteogenic mesenchyme that was included in the dissection. (E) E11 epithelial-mesenchymal recombinant shows a translucent zone of epithelial induction in mesenchyme (arrow). (F) Whole-mount in situ hybridization shows an absence of *Cbfa1* expression within the translucent zone (arrow). (G) In an E13 epithelial-mesenchymal recombinant, a well defined translucent zone of induction (arrow) is seen nearest the epithelial interface. (H) *Cbfa1* expression (arrow) is clearly localized to the translucent zone in the explant in G. (I) A similar explant as in H showing induction of *Cbfa1* expression (arrow) only in a restricted location within the translucent zone. (J) *Cbfa1* expression in the periphery of cultured E14 mesenchyme (representing follicle and osteogenic mesenchyme) but not in dental papilla mesenchyme. (K) E14 papilla mesenchyme without any follicle shows an absence of *Cbfa1* expression. (L) E14, recombinant culture showing stimulation of *Cbfa1* expression in mesenchyme adjacent to epithelium. (M) E14, *Cbfa1* expression in two dental papilla mesenchymes recombined with two epithelia. (N) A vibratome section (along the plane indicated in M) shows *Cbfa1* expression in mesenchyme surrounding epithelia. (O) E14 papilla mesenchyme treated with a *Cbfa1* sense riboprobe showing the absence of hybridization. m, mesenchyme alone; e+m, recombined epithelium and mesenchyme. +1 = 24 hours; +2 = 48 hours. Scale bar: 450  $\mu$ m.

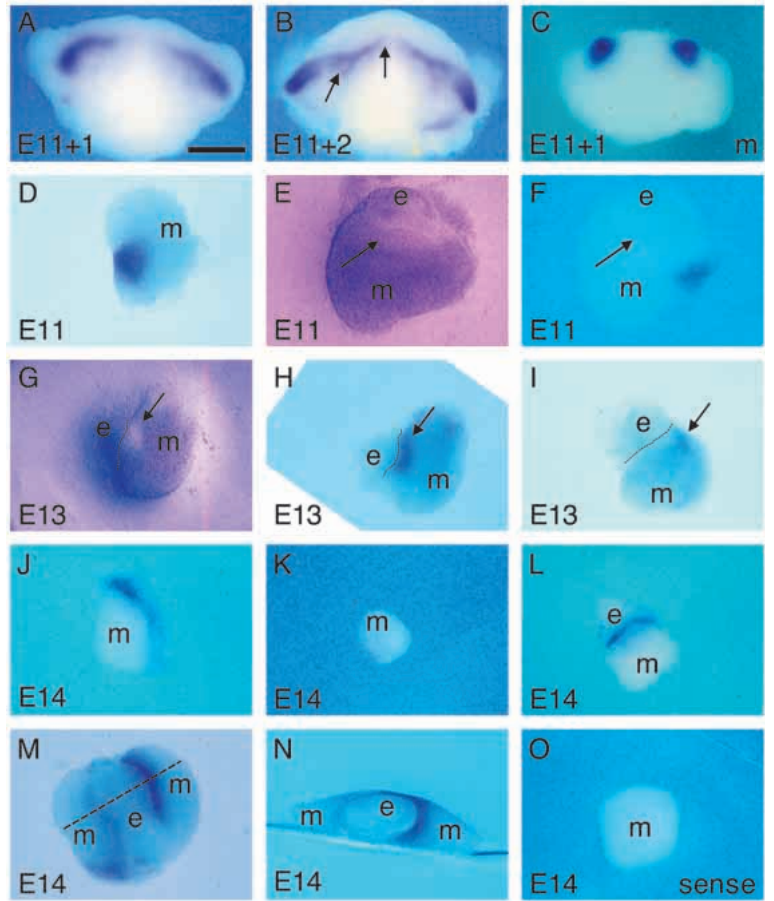

from E13 onwards when epithelial morphogenesis advances from the bud to the early bell stage.

**DISCUSSION**

Our results demonstrate that *Cbfa1* plays an important role in tooth development, in particular, epithelial morphogenesis. Furthermore, *Cbfa1* may indirectly influence tooth cytodifferentiation and function through its control of tooth morphogenesis. Our tissue recombination and bead

**Fig. 6.** Beads soaked in recombinant BMPs are not able to induce *Cbfa1* expression in dental mesenchyme. Dental mesenchymes were cultured with the beads for 24 hours and analyzed by whole-mount in situ hybridization using a digoxigenin-labeled *Cbfa1* riboprobe. (A,B) E11, failure of BMP-2 and BMP-7 to induce *Cbfa1* expression. (C,D) E11, distinct zone of induction of *Msx1* expression by BMP-2 (C) and BMP-7 (D). (E,F,G) E14, absence of *Cbfa1* expression around beads with BMP-2, BMP-7 and BMP-4 respectively. (H) E14, control explant treated with BSA-soaked bead or *Cbfa1* sense riboprobes (data not shown) do not show any staining. Patches of *Cbfa1* expression seen in regions distant from the bead likely represent endogenous expression in cells of contaminating osteogenic mesenchyme at E11 and at E14 (A,B,E and G). Scale bar: 450  $\mu$ m.

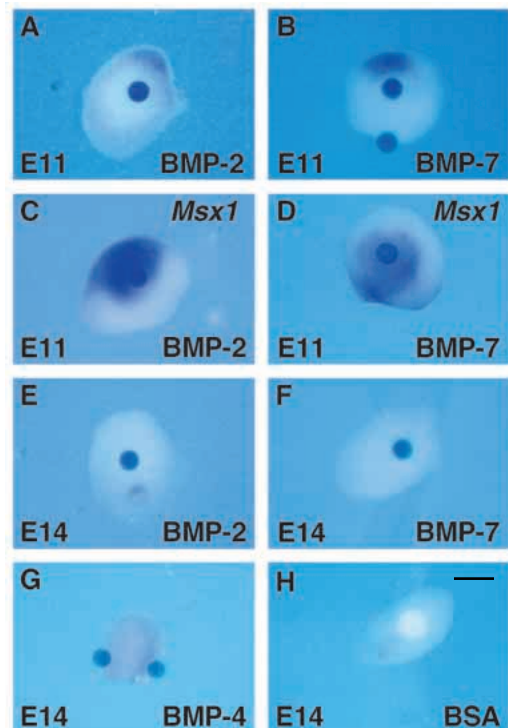



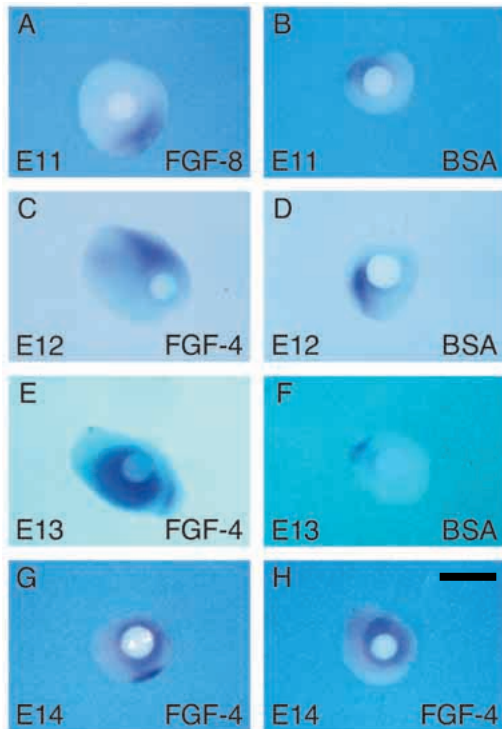

**Fig. 7.** The FGFs stimulate *Cbfa1* expression in dental papilla mesenchyme during advancing epithelial morphogenesis. (A) FGF-8 does not stimulate *Cbfa1* expression in E11 dental mesenchyme. (B) E11, control BSA bead; (C) E12, absence of *Cbfa1* induction around FGF-4 bead. (D) E12, control BSA bead. (E) E13, clear stimulation of *Cbfa1* expression around FGF-4 bead. (F) E13, control BSA bead. (G) E14, strong induction of *Cbfa1* around FGF-4 bead in dental mesenchyme. Note expression in peripheral cells from surrounding mesenchyme. (H) E14, dental papilla mesenchyme showing stimulation of *Cbfa1* expression around FGF-4 bead. In most explants treated with either FGF or BSA, patches of hybridization were visible that correspond to endogenous *Cbfa1* expression in osteogenic mesenchyme. Scale bar: 450  $\mu$ m.

implantation assays show that *Cbfa1* expression in dental mesenchyme is stimulated by epithelial signals which include FGF family members but not the BMPs.

### ***Cbfa1* is a mesenchymally expressed gene regulating epithelial morphogenesis**

The pattern of expression of *Cbfa1* in dental mesenchyme correlates with key developmental events. As tissue recombinations have demonstrated, tooth development is initiated by odontogenic epithelium and the inductive potential is transferred from the epithelium to mesenchyme by E12 (Mina and Kollar, 1987; Lumsden, 1988; review: Thesleff and Nieminen, 1996). The onset of *Cbfa1* expression in dental papilla mesenchyme follows its acquisition of odontogenic potential. Furthermore, the gene is downregulated in the dental papilla at the early bell stage, E16, when epithelial morphogenesis is advanced and cuspal development is underway. Thus, from E13 to E16, *Cbfa1* is apparently needed for progress of tooth development from the bud to the bell stage during which time there is rapid growth and folding of the enamel organ epithelium.

The expression of *Cbfa1* in the dental mesenchyme is unique

when compared to other genes like *Msx1*, *Bmp-4* and *Pax9* (see the www database at <http://honeybee.helsinki.fi/toothexp>, 1999). These regulatory molecules are induced by the early dental epithelium (E10-11) and are associated with the acquisition of odontogenic potential in the mesenchyme. Furthermore, they are expressed within the translucent zone underlying the epithelium in tissue recombination cultures. Here we showed that *Cbfa1* in dental mesenchyme was not induced by E11 odontogenic epithelium and that it was not expressed in the translucent zone.

A different function for *Cbfa1* is also indicated by the unique tooth phenotype in *Cbfa1*-deficient mice. *Cbfa1*<sup>-/-</sup> molars developed beyond the bud stage unlike those of mice with targeted inactivations of the *Msx1*, *Pax9*, *Lef1* and *activin- $\beta$ A* genes which arrested at the bud stage (Satokata and Maas, 1994; van Genderen et al., 1994; Matzuk et al., 1995; Peters et al., 1998). *Dlx1/2* compound mutants arrest at the lamina phase in maxillary molar development while in *Gli 2/3* and *Msx1/2* all teeth are arrested at the lamina stage (Qiu et al., 1997; Hardcastle et al., 1998; Bei and Maas, 1998 respectively). *Cbfa1*<sup>-/-</sup> molars were severely hypoplastic and misshapen but underwent epithelial morphogenesis to reach an aberrant bell stage at birth. Newborn mutant incisors that develop earlier showed abnormal odontoblasts, dentin formation and lacked enamel. Thus, it is likely that *Cbfa1*<sup>-/-</sup> molar organs would have progressed beyond the bell stage if pups had survived past birth. In extrapolating findings from our expression analysis to our interpretation of the *Cbfa1*<sup>-/-</sup> tooth phenotype, it is reasonable to speculate that the defect (delay) in molar odontogenesis was initiated earlier in development, most likely at E13.

It is possible that *Cbfa1* affects advancing tooth morphogenesis by acting upstream of diffusible signaling molecules within the mesenchyme, such as the BMPs, that in turn regulate gene expression within the enamel organ (Jernvall et al., 1998). Furthermore, *Cbfa1* may independently affect the expression of mesenchymal genes involved in the formation or degradation of basement membrane or other extracellular matrix components. The lack of a stable epithelial mesenchymal interface has been shown to affect proper tooth morphogenesis (Ruch et al., 1983) and could account for the abnormal molar enamel organs seen in *Cbfa1*<sup>-/-</sup> mice.

Our expression analysis also revealed that *Cbfa1* is initially restricted to the buccal aspect of the maxillary and mandibular arches (see Figs. 2A,C). This may be significant, since in biphyodont mammalian dentition, succedaneous tooth organs develop as a lingual extension of the dental lamina. Our expression data together with the finding of supernumerary teeth in CCD patients (Jones, 1997) may reflect *Cbfa1*'s potential role as a negative regulator of dental lamina outgrowth.

### **Role of *Cbfa1* in the differentiation of mineralized tooth matrix-producing cells**

Because *Cbfa1* is critical for osteoblast differentiation, we explored its expression during odontoblast differentiation. The marked downregulation in differentiated odontoblasts contrasted with the high levels of *Cbfa1* expression in osteoblasts throughout craniofacial ossification. Our phenotypic analyses in newborn *Cbfa1* mutants revealed the presence of poorly differentiated odontoblasts and a highly



disorganized dentin matrix (in incisors alone). How *Cbfa1* at the molecular level affects odontoblast differentiation has yet to be elucidated. One possibility is that inductive signals are turned on in dental epithelium by a *Cbfa1*-dependent pathway and that these molecules then act back upon the mesenchyme to stimulate odontoblast differentiation. Alternatively, *Cbfa1* may regulate the expression of other inductive molecules in the mesenchyme that directly influence odontoblast differentiation.

The finding of *Cbfa1* transcripts in maturative phase ameloblasts is the first demonstration of the presence of this transcription factor in ectodermal cells involved in mineralization. It is possible that *Cbfa1* affects enamel maturation and/or the fate of ameloblasts which is believed to be one of programmed cell death. Our analysis of neonate mutant incisors showed that ameloblasts whose differentiation is dependent on the presence of predentin failed to develop. This implies that the osteodentin-like matrix seen in *Cbfa1* mutant incisors was defective. That the absence of *Cbfa1* compromised the differentiation of odontoblasts and ameloblasts was not surprising since in tooth development cytodifferentiation is dependent on morphogenesis.

The expression of *Cbfa1* by the dental follicle through late odontogenesis suggests that the gene may be involved with cementum formation. Our tissue recombination experiments suggest that the regulation of *Cbfa1* expression in dental follicle may be different from that in dental papilla. It is possible therefore, that *Cbfa1*'s function in cementogenesis is similar to its role in osteogenesis and may differ from its potential role in dentin formation. This is an important observation because it indicates that the mechanisms regulating the differentiation and function of tooth mineralized tissue cells (odontoblasts and ameloblasts) may differ from that of osteoblasts.

### ***Cbfa1* expression in dental mesenchyme is stimulated by epithelial-mesenchymal interactions and by the FGFs**

Our tissue recombination studies with whole E11 mandibular arches showed that the initiation and maintenance of *Cbfa1* expression in osteogenic mesenchyme did not require epithelium at this stage. The cultures of isolated mesenchyme from the tooth region in E11 to E13 embryos in which patches of *Cbfa1* expression were frequently seen also supported the conclusion that the maintenance of *Cbfa1* in the osteogenic mesenchyme does not depend on epithelial signals. It is possible that epithelial signals regulate the initiation of *Cbfa1* expression and subsequent osteogenesis at an earlier stage, as has been suggested previously in cranial bones (Hall, 1978). We have in fact observed that in E10 mandibular explants, epithelium is required for the onset of *Cbfa1* expression in osteogenic mesenchyme (unpublished observations). However, as the epithelium significantly enhanced the growth of the mandibular mesenchyme in culture, these positive effects of the epithelium on *Cbfa1* expression and bone formation may relate to non-specific trophic effects permitting the advancing differentiation of predetermined osteogenic mesenchyme. Hence, our studies do not allow definite conclusions to be made concerning the requirement of epithelium for the initiation of *Cbfa1* expression and bone development for the mandibular arch.

Earlier studies indicate that E11 dental epithelium stimulates the expression of numerous developmental regulatory genes in the mesenchyme (Thesleff and Sharpe, 1997) and that these stimulatory effects can be mimicked by signaling molecules including FGF-8 and BMP-2, BMP-4 and BMP-7. Our tissue recombinations demonstrate that dental epithelium of E11 and E12 embryos did not induce *Cbfa1* in the underlying mesenchyme. From our bead implantation assays we conclude that neither BMPs nor FGFs stimulated *Cbfa1* expression in E11 and E12 mesenchyme, while the BMPs did induce *Msx1* expression (Vainio et al., 1993). These experiments as well as the unique expression pattern of *Cbfa1* indicate that it is not involved in the transfer of inductive potential from epithelium to mesenchyme. Rather we suggest that *Cbfa1* is an important regulatory molecule in the subsequent interactions between the dental epithelium and mesenchyme which regulate epithelial morphogenesis and thus the shape of the tooth.

Our data indicate that after the initiation of odontogenesis, epithelium had a clear stimulatory effect on *Cbfa1* expression in dental mesenchyme (see Fig. 5). This is consistent with our expression analyses that showed *Cbfa1* expression in E13 dental mesenchyme under the epithelial bud and at the cap stage (E14), when expression was intense throughout the dental papilla. Our bead assays showed that the epithelial induction of *Cbfa1* expression in E13 and E14 dental mesenchyme was mimicked by FGFs whereas the BMPs had no inductive effects. Interestingly, at E13, FGF beads induced *Cbfa1* expression in most explants whereas the epithelium had a clear stimulatory effect in only two cultures and a weak effect in five out of ten explants. This is consistent with the fact that the expression of *Fgf-4* and *Fgf-9* appear at E13 at the tip of the epithelial tooth bud *in vivo*, coincident with the start of *Cbfa1* expression in the subjacent underlying dental mesenchyme. These *Fgfs* are expressed through the cap stage in the epithelial enamel knot, a structure expressing several other signaling molecules and believed to act as a signaling center regulating tooth crown formation (Jernvall et al., 1998), and in E14 mesenchyme the epithelium as well as FGFs stimulated *Cbfa1* expression in all explants. The enamel knot curiously disappears at a time coincident with the down regulation of *Cbfa1* in dental papilla. Based on our experiments we conclude that dental epithelium and FGFs stimulate the expression of *Cbfa1* in E13 and E14 dental papilla mesenchyme. We cannot conclusively distinguish from these studies whether this stimulation reflects the induction of *de novo* expression of *Cbfa1* or whether it represents the maintenance of existing *Cbfa1* expression.

In conclusion, these studies suggest that *Cbfa1* plays a unique and essential role in tooth development. *Cbfa1*'s expression in dental mesenchyme is controlled by signals emanating from the dental epithelium. In turn, *Cbfa1* regulates the expression of mesenchymal molecules that act reciprocally on epithelium to control the histo- and morpho-differentiation of the enamel organ. Thus, *Cbfa1* may indirectly influence odontoblast and ameloblast differentiation by regulating genes that control the terminal differentiation of these cell types. In light of these data we interpret the abnormalities in tooth formation seen in *Cbfa1*<sup>-/-</sup> mice as a demonstration of its distinct role in tooth development that is not indirectly linked to the absence of osteogenesis. The molecular mechanisms underlying *Cbfa1*'s role/s in tooth development may thus differ

from its function in bone formation and offers new insights into the process of cell differentiation in mineralized tissues.

We are grateful to Ms. Riikka Santalahti, Ms. Merja Mäkinen, Ms. Kaija Kettunen, Dr Donald Larson and Meredith Scott for their excellent technical assistance. We also acknowledge the advice and comments about the manuscript from Dr A. L. J. J. Bronckers. This work was supported by grants from the National Institutes of Health DE-10517 and DE-11663 (R. D. S.) and DE11290 and HD-97-006 (G. K.) and from the Finnish Academy and Human Frontier Science Program no. RG 558/95 (I. T.).

## REFERENCES

- Åberg, T., Wozney, J. and Thesleff, I. (1997). Expression patterns of BMPs in the developing mouse tooth suggests roles in morphogenesis and cell differentiation. *Dev. Dyn.* **210**, 407-416.
- Bei, M. and Maas, R. (1998). FGFs and BMP4 induce both *Msx-1* independent and *Msx-1* dependent signaling pathways in early tooth development. *Development* **125**, 4325-4333.
- D'Souza, R. N., Cavender, A., Sunavala, G., Ohshima, A. J., Kulkarni, A. B. and MacDougall, M. (1997). Gene expression patterns of murine dentin matrix protein 1 (Dmp1) and dentin sialophosphoprotein (DSPP) suggests distinct developmental functions in vivo. *J. Bone Miner. Res.* **12**, 2040-2049.
- D'Souza, R. N., Niederreither, K. and de Crombrughe, B. (1993). Osteoblast-specific expression of the alpha 2(I) collagen promoter in transgenic mice: correlation with the distribution of TGF-beta 1. *J. Bone Mineral Res.* **8**, 1127-1136.
- Ducy, P. and Karsenty, G. (1995). Two distinct osteoblast-specific *cis*-acting elements control expression of the mouse osteocalcin gene. *Mol. Cell. Biol.* **15**, 1858-1869.
- Ducy, P., Zhang, R., Geoffroy, V., Ridall, A. L. and Karsenty, G. (1997). Osf2/Cbfa1: a transcriptional activator of osteoblast differentiation. *Cell* **89**, 747-754.
- Hall, B.K. (1978). Initiation of osteogenesis by mandibular mesenchyme. *Arch. Oral Biol.* **23**, 1157-1161.
- Hardcastle Z, Mo R, Hui CC, Sharpe PT (1998). The Shh signalling pathway in tooth development: defects in Gli2 and Gli3 mutants. *Development* **125**, 2803-2811.
- Henrique, D., Adam, J., Myat, A., Chitnis, A., Lewis, J and Ish-Horwitz, D. (1995). Expression of a Delta homologue in prospective neurons in the chick. *Nature* **375**, 787-790.
- Jernvall, J., Åberg, T., Kettunen, P., Keranen, S. and Thesleff, I. (1998). The life history of an embryonic signalling center: BMP-4 induces p21 and is associated with apoptosis in the mouse tooth enamel knot. *Development* **125**, 161-169.
- Jones, K. L. (1997). *Smith's Recognizable Patterns of Human Malformation*. 5th Ed. Philadelphia: W.B. Saunders Company.
- Komori, T., Yagi, H., Nomura, S., Yamaguchi, A., Sasaki, K., Deguchi, K., Shimizu, Y., Bronson, R. T., Gao, Y. H., Inada, M., Sato, M., Okamoto, R., Kitamura, Y., Yoshiki, S. and Kishimoto, T. (1997). Targeted disruption of Cbfa1 results in a complete lack of bone formation owing to maturational arrest of osteoblasts. *Cell* **89**, 755-764.
- Lee, B., Thirunavukkarasu, K., Zhou, L., Pastore, L., Baldini, A., Hecht, J., Geoffroy, V., Ducy, P. and Karsenty, G. (1997). Missense mutations abolishing DNA binding of the osteoblast specific transcription factor OSF2/CBFA1 in cleidocranial dysplasia. *Nature Genet.* **16**, 307-310.
- Linde, A. and Goldberg, M. (1993). Dentinogenesis. *Crit. Rev. Oral Biol. Med.* **4**, 679-728.
- Lumsden, A. G. S. (1988). Spatial organisation of the epithelium and the role of neural crest cells in the initiation of the mammalian tooth. *Development* **103 Supplement**, 155-169.
- Maas, R. and Bei, M. (1997). The genetic control of early tooth development. *Crit. Rev. Oral Biol. Med.* **8**, 4-39.
- Matzuk, M. M., Kumar, T. R., Vassalli, A., Bickenbach, J. R., Roop, D. R., Jaenisch, R. and Bradley, A. (1995). Functional analysis of activins during mammalian development. *Nature* **374**, 354-356.
- Metsäranta, M., Toman, De., deCrombrughe, B. and Vuorio, E. (1991). Specific hybridization probes for mouse type 1,2,3 and 9 collagen mRNA. *Biochim. Biophys. Acta* **18**, 241-243.
- Mina, M. and Kollar, E. J. (1987). The induction of odontogenesis in non-dental mesenchyme combined with early murine mandibular arch epithelium. *Arch. Oral Biol.* **32**, 123-127.
- Mundlos, S., Otto, F., Mundlos, C., Mulliken, J. B., Aylsworth, A. S., Albright, S., Lindhout, D., Cole, W. G., Henn, W., Knoll, J. H., Owen, M. J., Mertelsmann, R., Zabel, B. U. and Olsen, B. R. (1997). Mutations involving the transcription factor CBFA1 cause cleidocranial dysplasia. *Cell* **89**, 773-779.
- Ogawa, E., Maruyama, M., Kagoshima, H., Inuzuka, M., Lu, J., Satake, M., Shigesada, K. and Ito, Y. (1993). PEBP2/PEA2 represents a new family of transcription factor homologous to the products of the *Drosophila runt* and the human *AML1* gene. *Proc. Natl. Acad. Sci. USA* **90**, 6859-6863.
- Otto, F., Thornell, A. P., Crompton, T., Denzel, A., Gilmour, K. C., Rosewell, I. R., Stamp, G. W., Beddington, R. S., Mundlos, S., Olsen, B. R., Selby, P. B. and Owen, M. J. (1997). Cbfa1, a candidate gene for cleidocranial dysplasia syndrome, is essential for osteoblast differentiation and bone development. *Cell* **89**, 765-771.
- Peters, H., Neubüser, A., Kratochwil, K. and Balling, R. (1998). Pax9-deficient mice lack pharyngeal pouch derivatives and teeth and exhibit craniofacial and limb abnormalities. *Genes Dev.* **12**, 2735-2747.
- Qiu, M., Bulfone, A., Ghattas, I., Meneses, J., Sharpe, P. T., Presley, R., Pederson, R. A. and Rubenstein, J. L. R. (1997). Role of the Dlx homeobox genes in proximodistal patterning of the branchial arches: mutations of Dlx-1, Dlx-2, and Dlx-1 and -2 alter morphogenesis of proximal skeletal and soft tissue structures derived from first and second arches. *Dev. Biol.* **185**, 165-184.
- Ruch, J. V., Lesot, H., Karcher-Djuricic, V., Meyer, J. M. and Mark, M. (1983). Epithelial-mesenchymal interactions in tooth germs: mechanism of differentiation. *J. Biol. Buccale* **11**, 173-193.
- Satokata, I. and Maas, R. (1994). *Msx1* deficient mice exhibit cleft palate and abnormalities of craniofacial and tooth development. *Nature Genet.* **6**, 348-356.
- Thesleff, I., Vaahtokari, A., Partanen, A. M. (1995). Regulation of organogenesis. Common molecular mechanisms regulating the development of teeth and other organs. *Int. J. Dev. Biol.* **39**, 35-50.
- Thesleff, I., Nieminen, P. (1996). Tooth morphogenesis and cell differentiation. *Curr. Opin. Cell Biol.* **8**, 844-850.
- Thesleff, I. and Sharpe, P. (1997). Signalling networks regulating dental development. *Mech. Dev.* **67**, 111-123.
- Vaahtokari, A., Åberg, T. and Thesleff, I. (1996). Apoptosis in the developing tooth: association with an embryonic signaling center and suppression by EGF and FGF-4. *Development* **122**, 121-129.
- Vainio, S., Jalkanen, M., Vaahtokari, A., Sahlberg, C., Mali, M., Bernfield, M. and Thesleff, I. (1991). Expression of syndecan gene is induced early, is transient, and correlates with changes in mesenchymal cell proliferation during tooth organogenesis. *Dev. Biol.* **147**, 322-333.
- Vainio, S., Karavanova, I., Jowett, A. and Thesleff, I. (1993). Identification of BMP-4 as a signal mediating secondary induction between epithelial and mesenchyme tissues during early tooth development. *Cell* **75**, 45-58.
- Van Gasteren, C., Okamura, R. M., Farinas, I., Quo, R. G., Parslow, T. G., Bruhn, L. and Grosschedl, R. (1994). Development of several organs that require inductive epithelial-mesenchymal interactions is impaired in LEF-1 deficient mice. *Genes Dev.* **5**, 656-669.
